# Supplementary material for: Protonation-controlled axial chirality in maleopimaric imides
Source: Royal Society of Chemistry journal article supplement (doi:10.1039/c3nj01194a), 2013-11-05
Supplement: c3nj01194a.pdf [file c3nj01194a.pdf]

## Protonation-controlled axial chirality in maleopimaric imides

Guiyang Yao,<sup>a, b†</sup> Yajun Li,<sup>b†</sup> Yongtao Zhu,<sup>b</sup> Yingming Pan,<sup>b</sup> Fuping Huang,<sup>b</sup> Hengshan Wang<sup>\*b</sup>  
and Zhixin Liao<sup>\*a</sup>

<sup>a</sup> Department of Pharmaceutical Engineering, School of Chemistry and Chemical Engineering, Southeast

University, Nanjing 211189, PR China

<sup>b</sup> Key Laboratory for the Chemistry and Molecular Engineering of Medicinal Resources, School of Chemistry &

Chemical Engineering of Guangxi Normal University, Guilin 541004, P. R. China.

### Synthesis

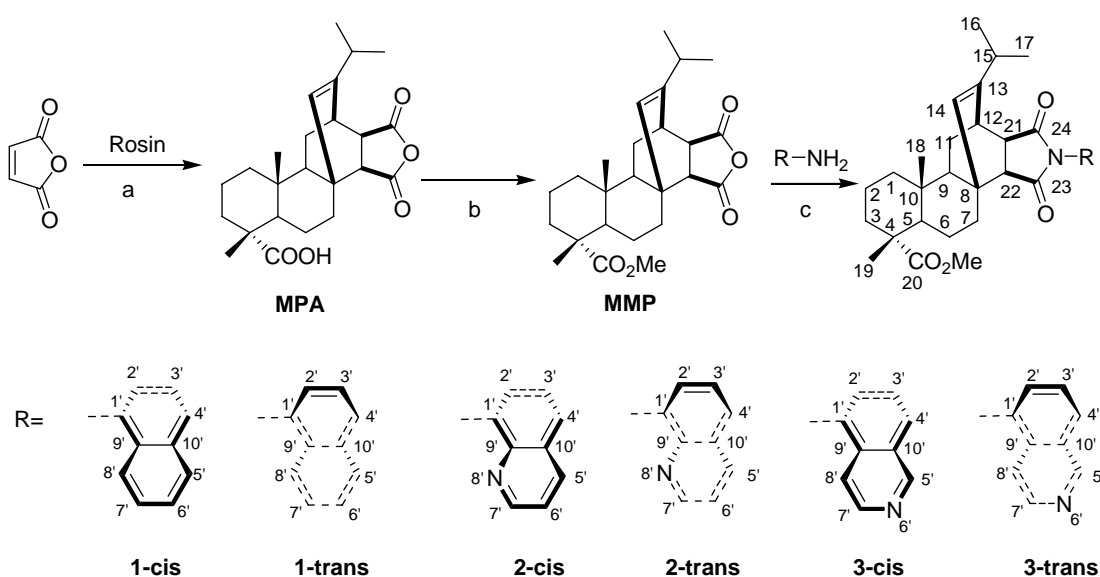

Scheme 1

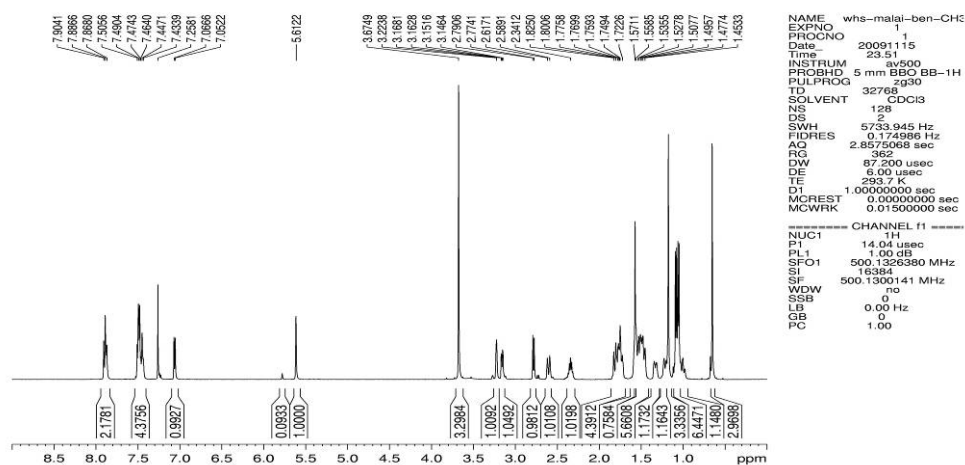

Figure S1. <sup>1</sup>H NMR spectrum of 1 (initial state) (CDCl<sub>3</sub>, 500 MHz).

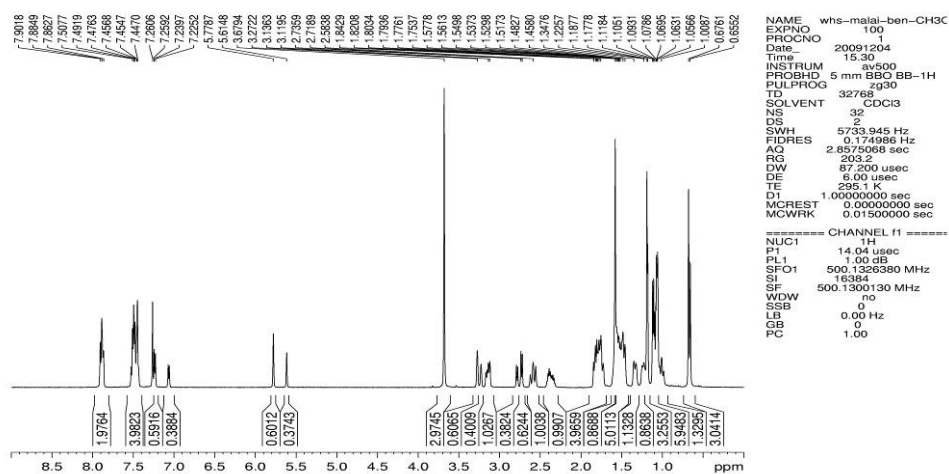

**Figure S2.**  $^1\text{H}$  NMR spectrum of **1** (equilibrium state) ( $\text{CDCl}_3$ , 500 MHz).

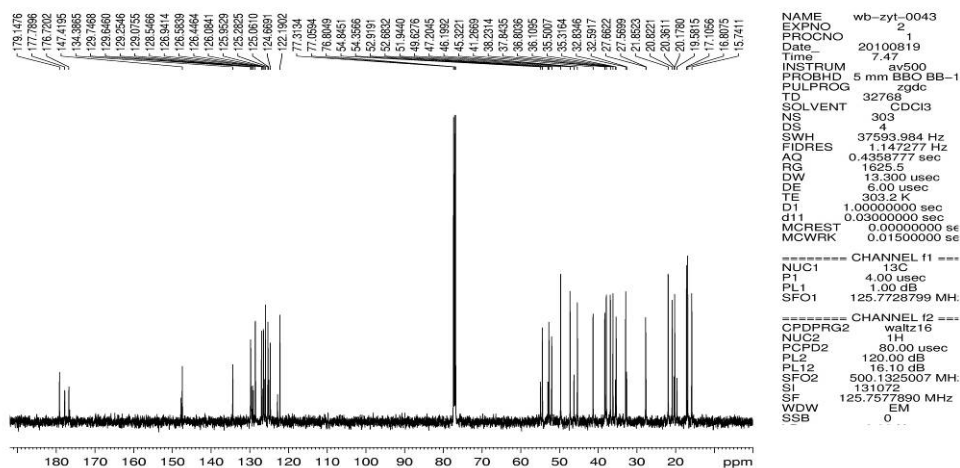

**Figure S3.**  $^{13}\text{C}$  NMR spectrum of **1** (initial state) ( $\text{CDCl}_3$ , 125 MHz).

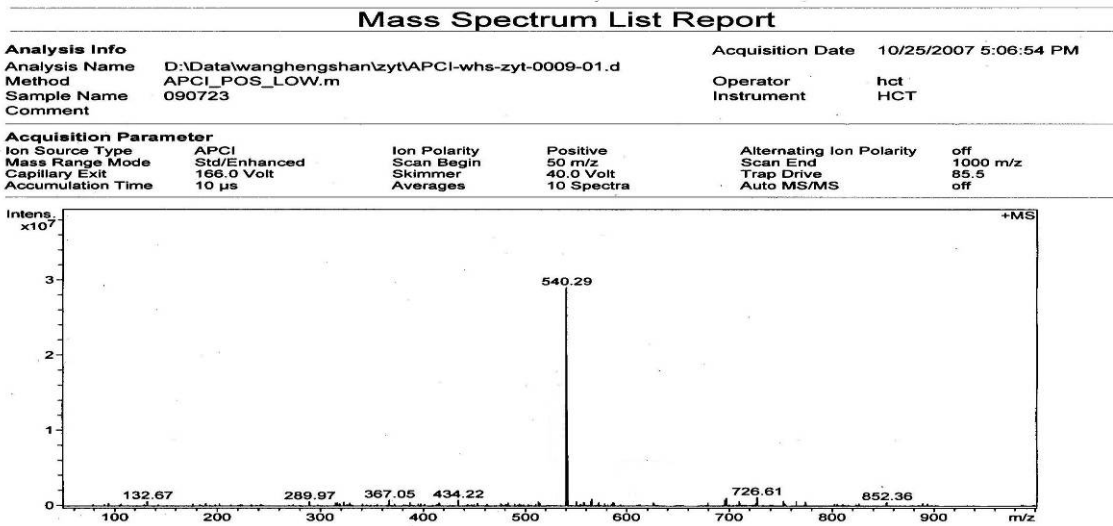

Figure S4. MS spectrum of 1.

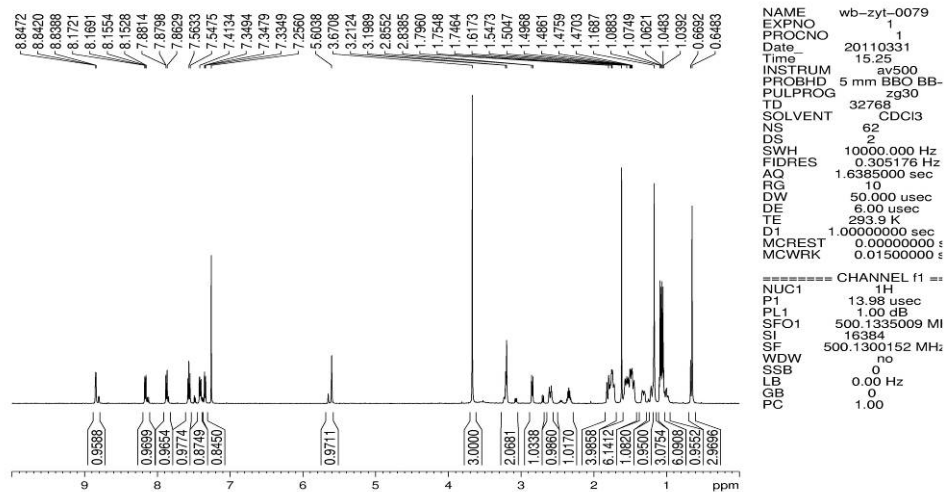

Figure S5. <sup>1</sup>H NMR spectrum of 2 (initial state) (CDCl<sub>3</sub>, 500 MHz).

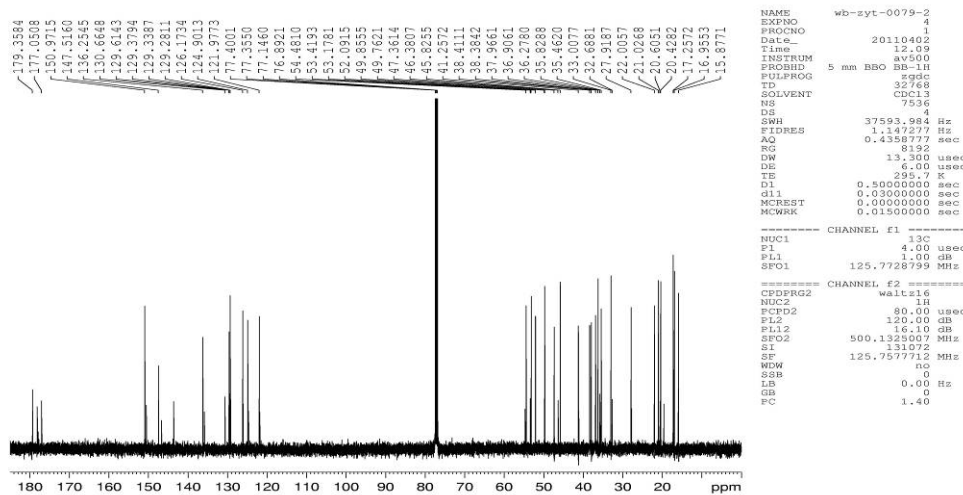

Figure S6. <sup>13</sup>C NMR spectrum of 2 (initial state) (CDCl<sub>3</sub>, 125 MHz).

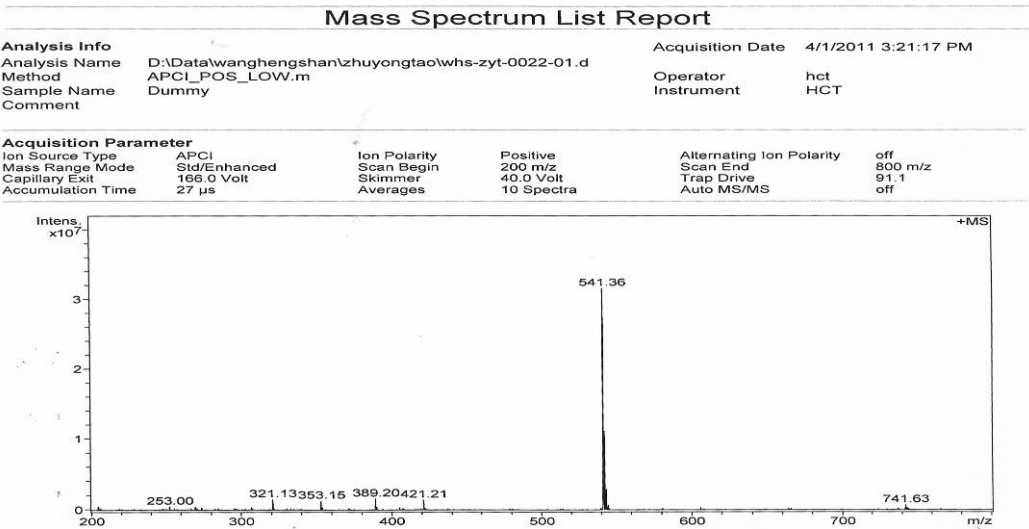

Figure S7. MS spectrum of **2**.

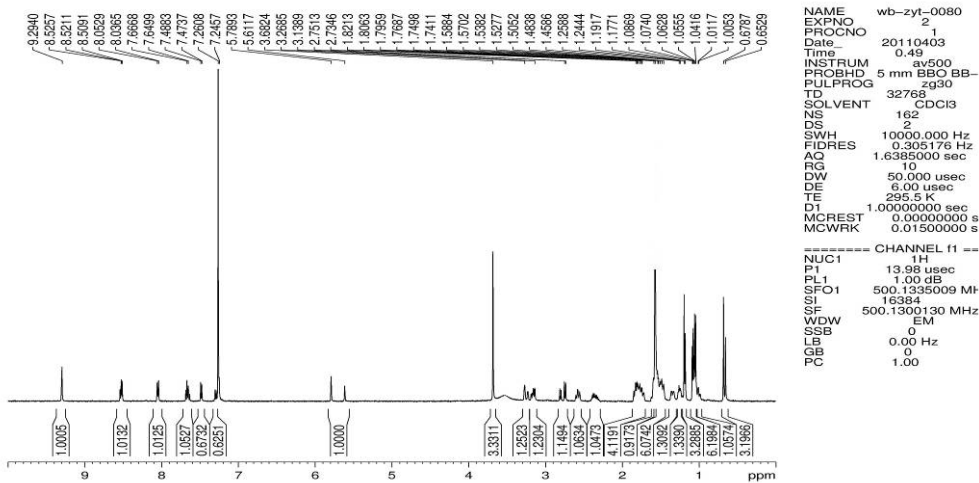

Figure S8. <sup>1</sup>H NMR spectrum of **3** (initial state) (CDCl<sub>3</sub>, 500 MHz).

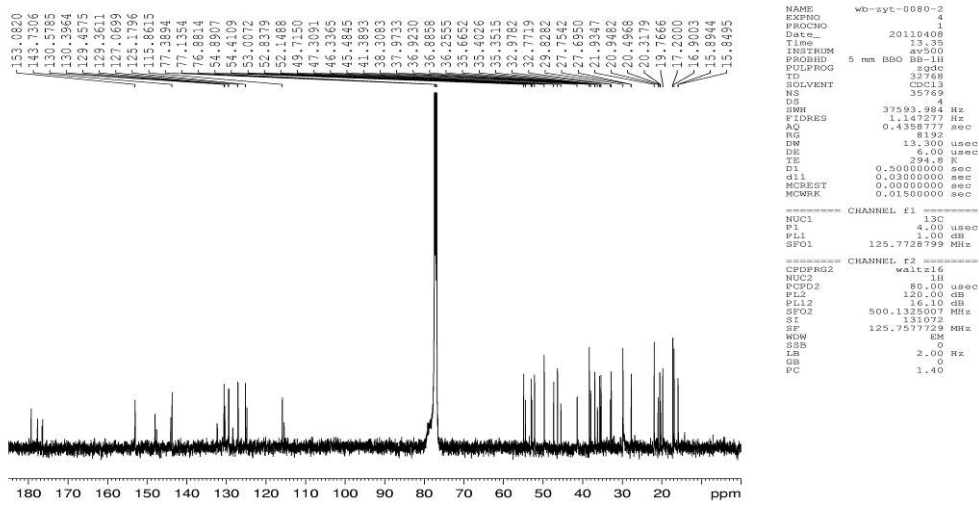

Figure S9. <sup>13</sup>C NMR spectrum of **3** (initial state) (CDCl<sub>3</sub>, 125 MHz).

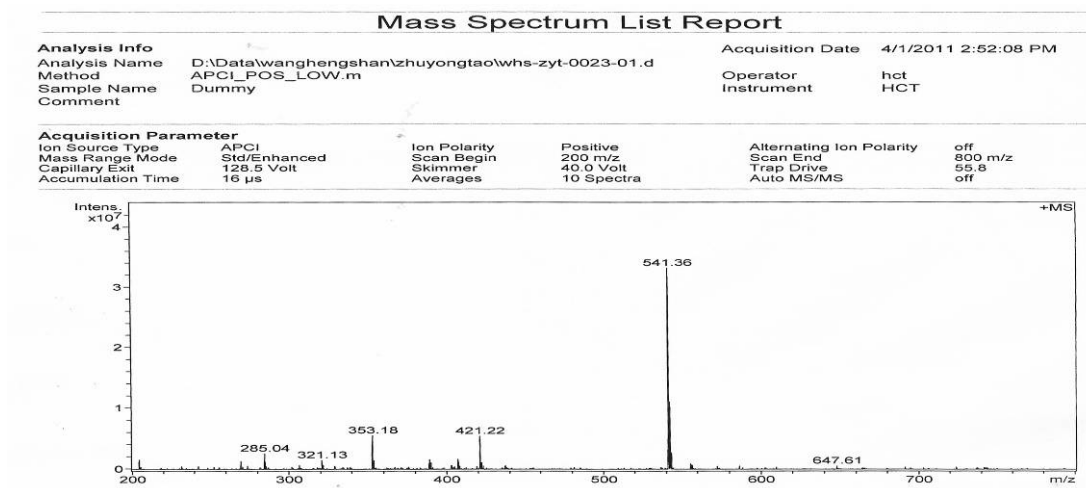

Figure S10. MS spectrum of **3**.

## 2D NMR

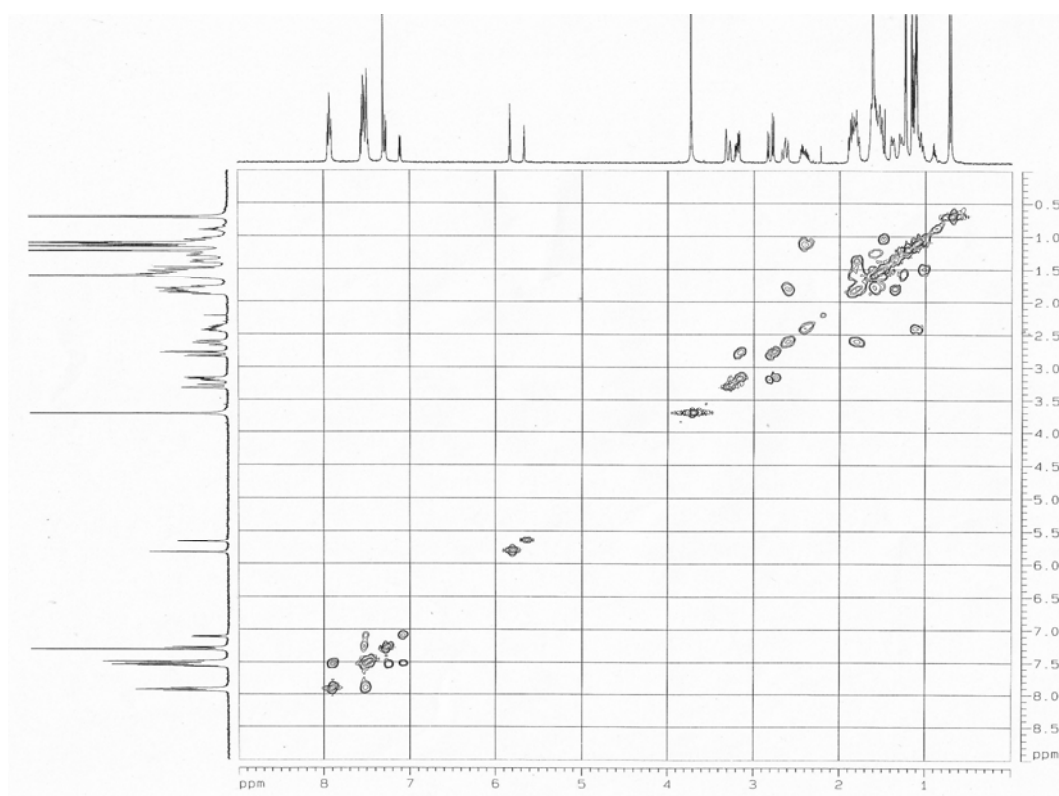

Figure S11 <sup>1</sup>H-<sup>1</sup>H COSY spectrum of **1**

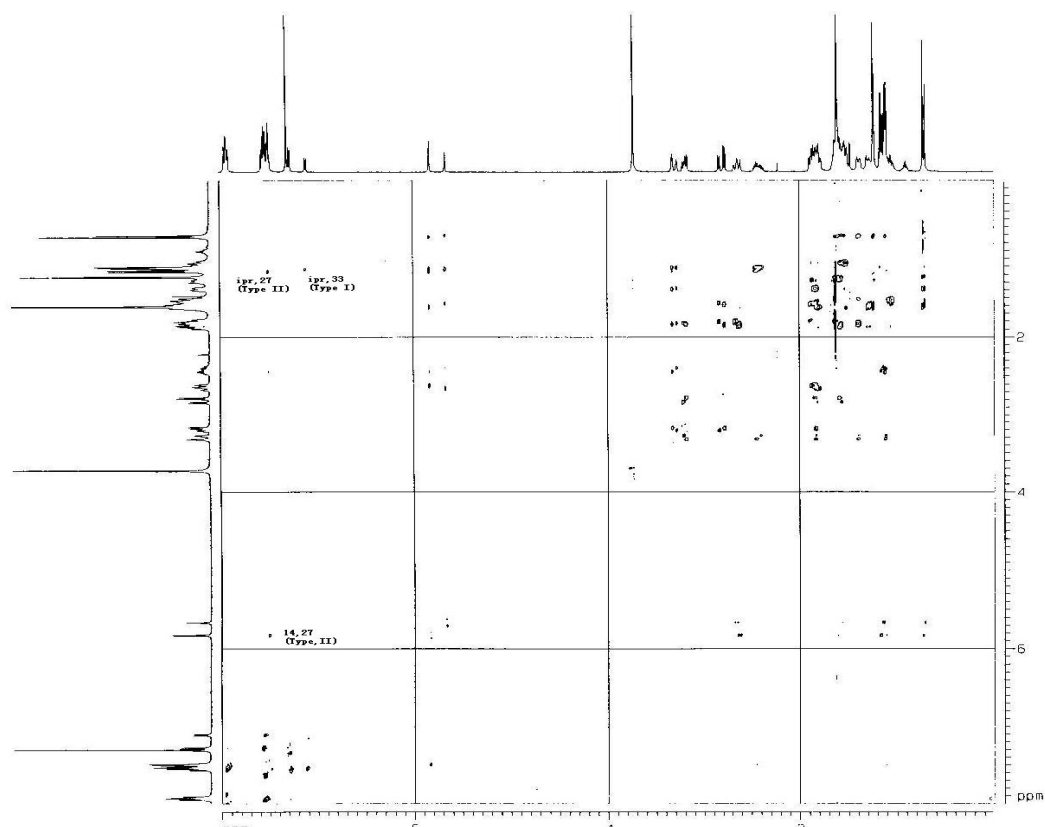

Figure S12  $^1\text{H}$ - $^1\text{H}$  NOESY spectrum of **1**

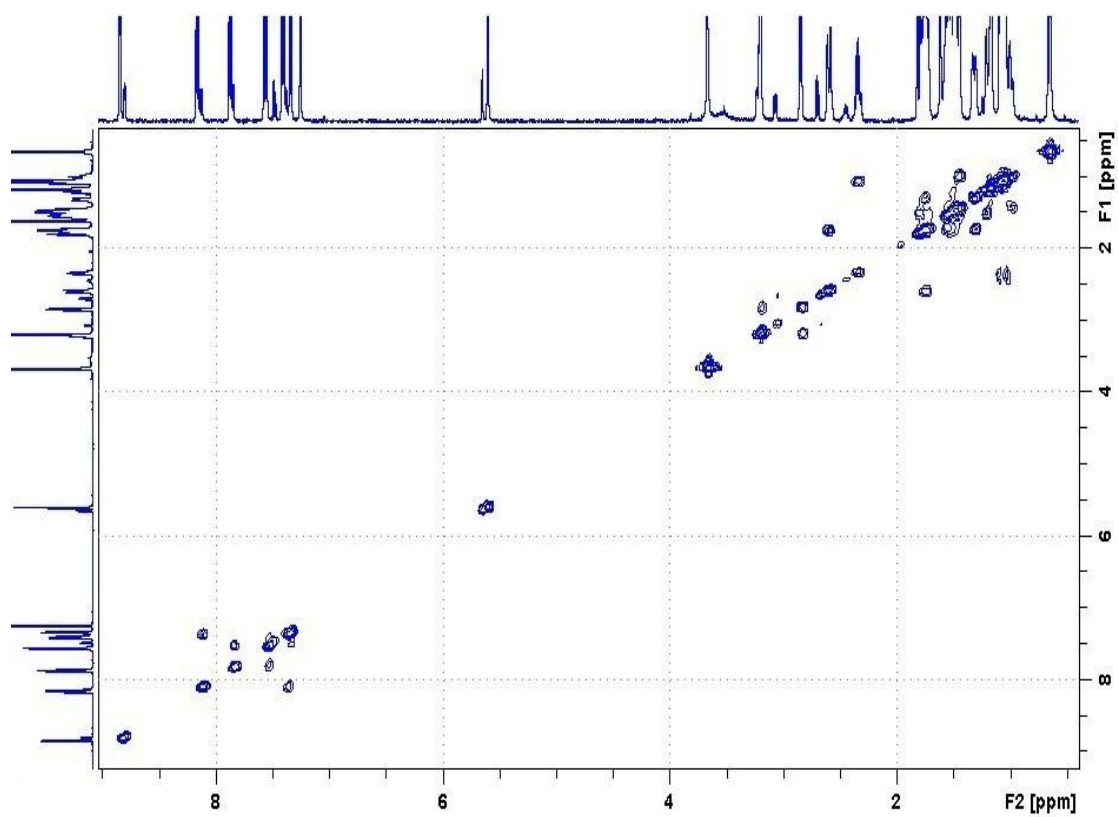

Figure S13  $^1\text{H}$ - $^1\text{H}$  COSY spectrum of **2**

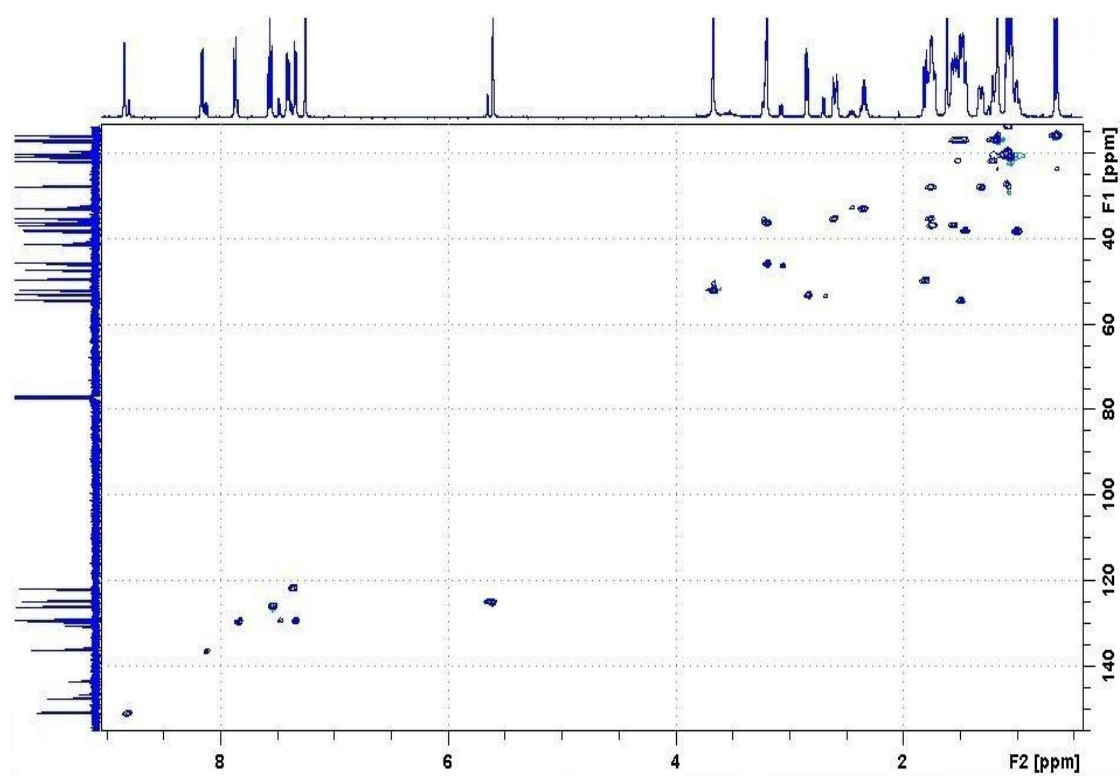

Figure S14  $^1\text{H}$ - $^{13}\text{C}$  HSQC spectrum of **2**.

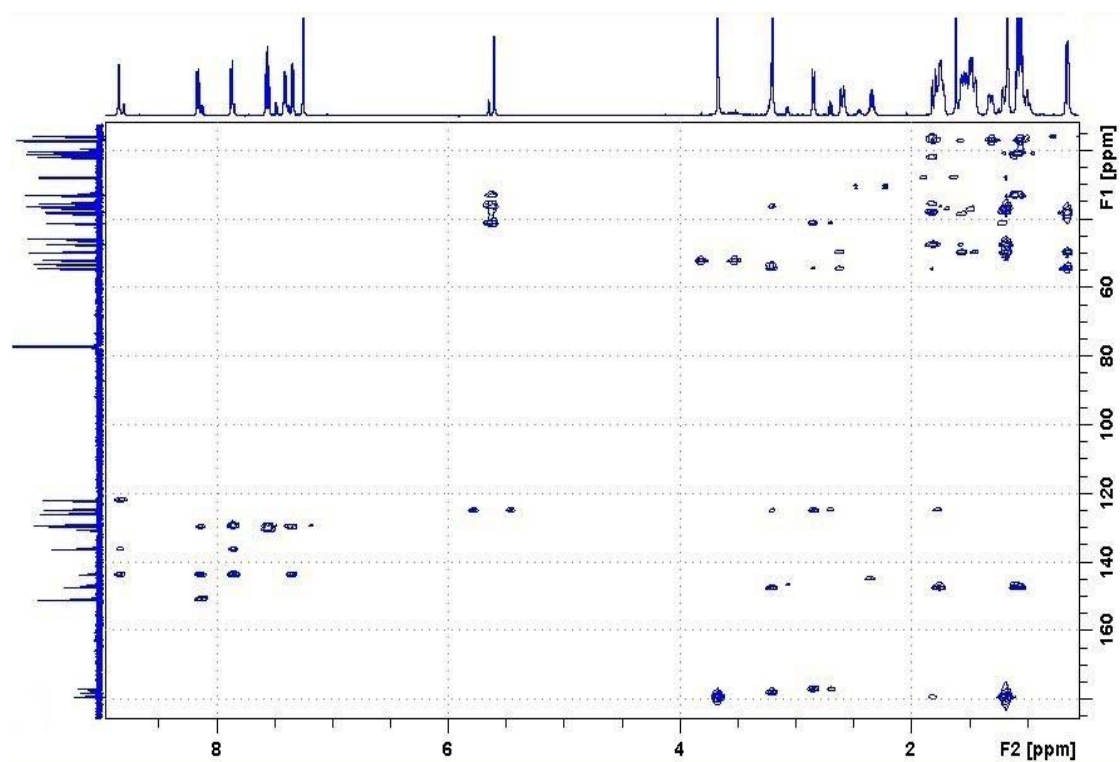

Figure S15  $^1\text{H}$ - $^{13}\text{C}$  HMBC spectrum of **2**.

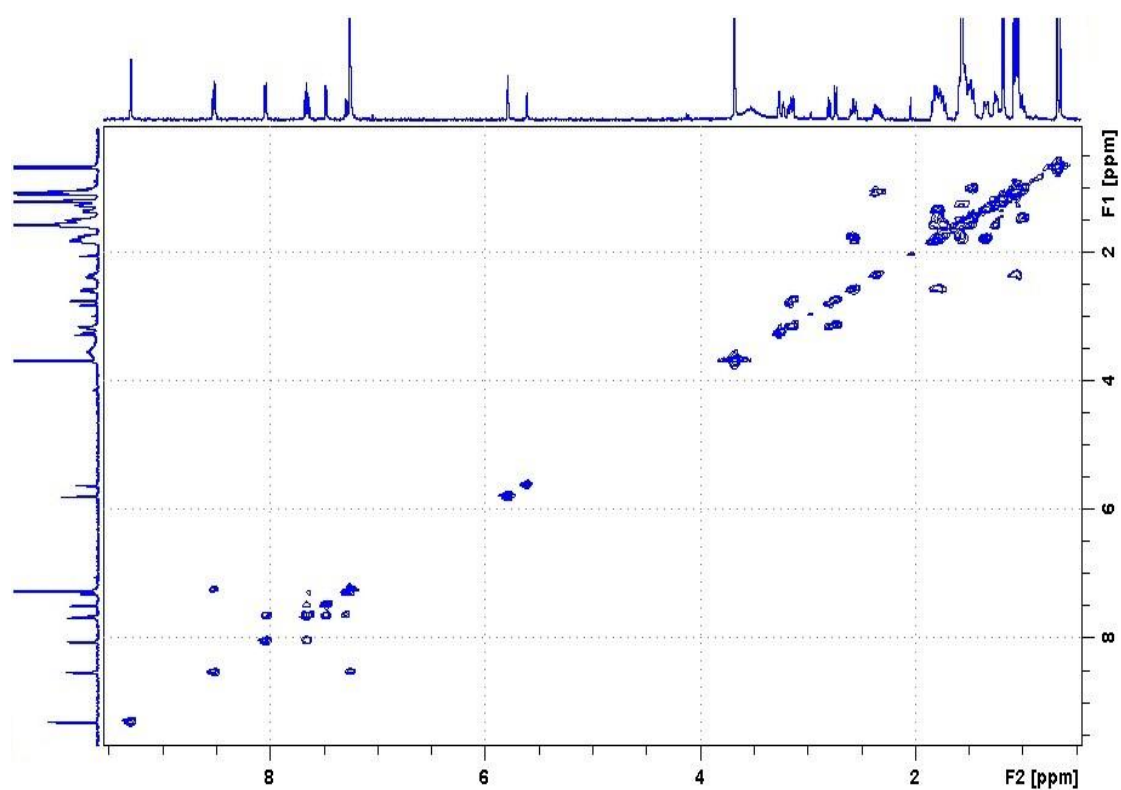

Figure S16  $^1\text{H}$ - $^1\text{H}$  COSY spectrum of **3**.

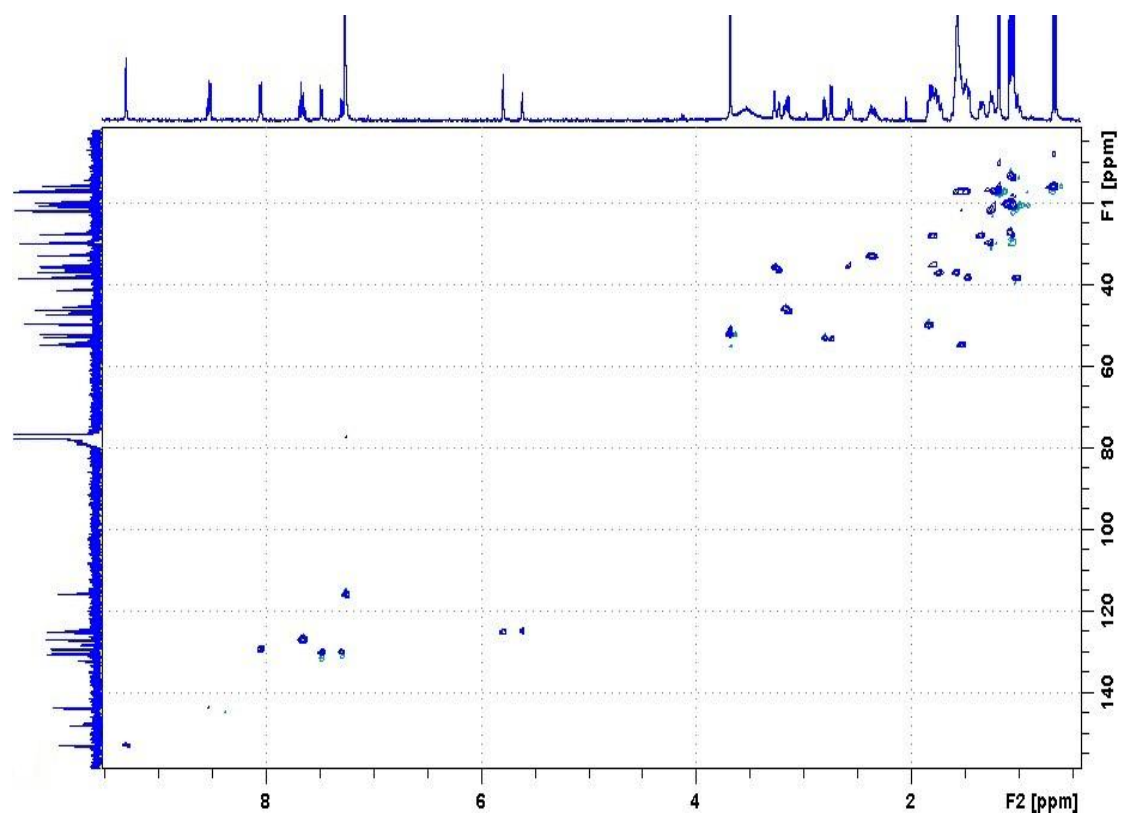

Figure S17  $^1\text{H}$ - $^{13}\text{C}$  HSQC spectrum of **3**.

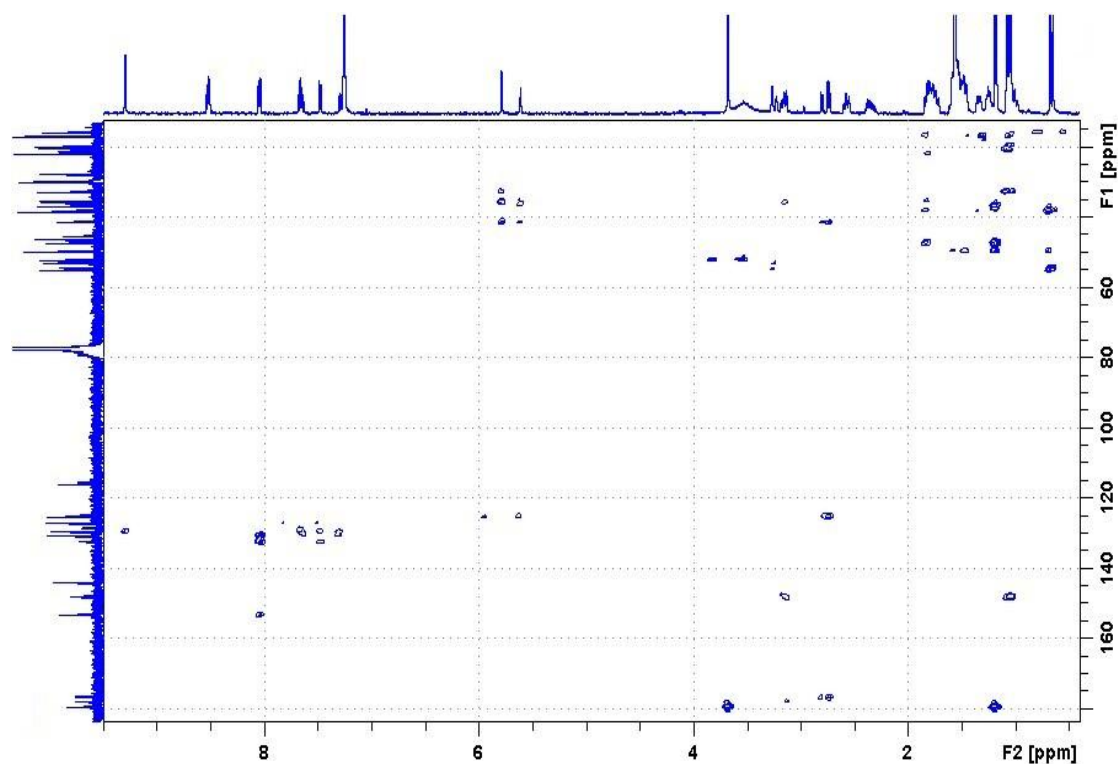

**Figure S18**  $^1\text{H}$ - $^1\text{H}$  HMBC spectrum of **3**.

### Kinetic study

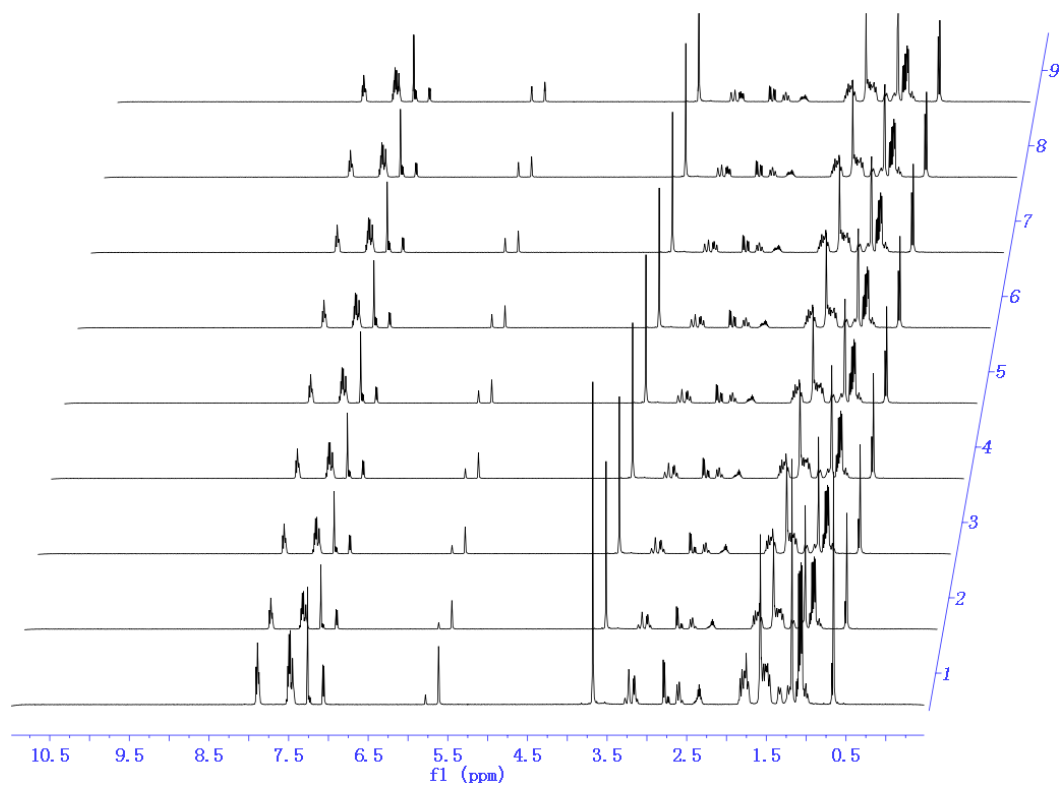

**Figure S19.** Rational barrier study overlay of **1** in  $\text{CDCl}_3$  via NMR (293K)

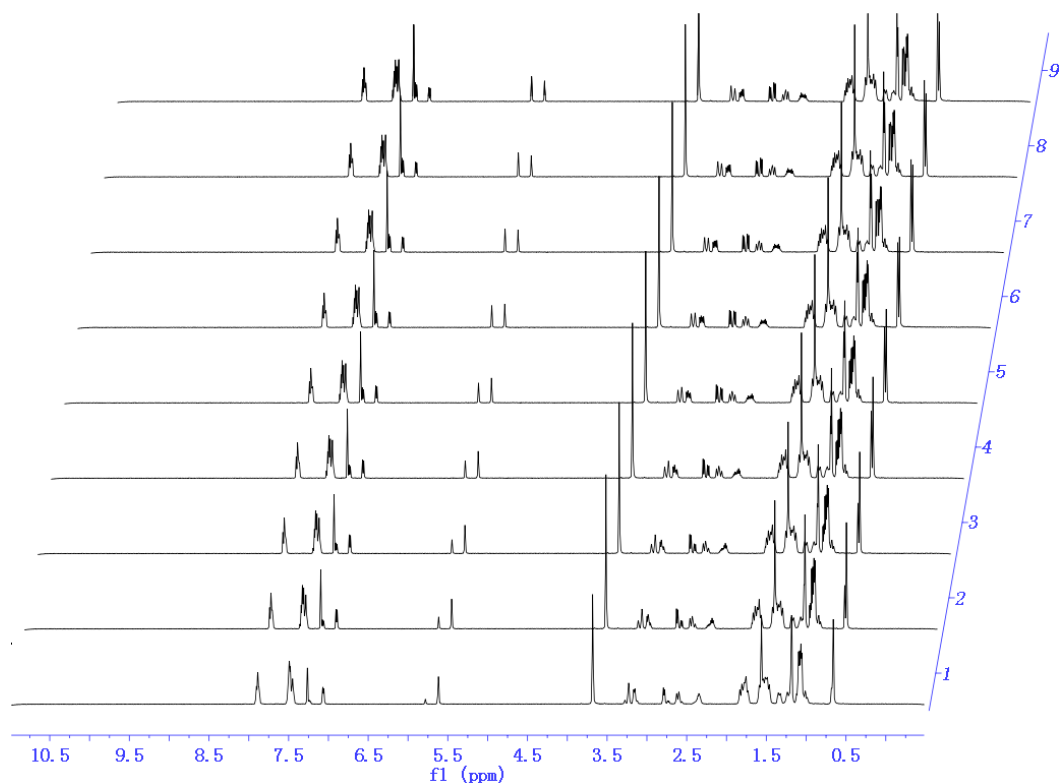

**Figure S20. Rational barrier study overlay of 1 in  $\text{CDCl}_3$  via NMR (303K)**

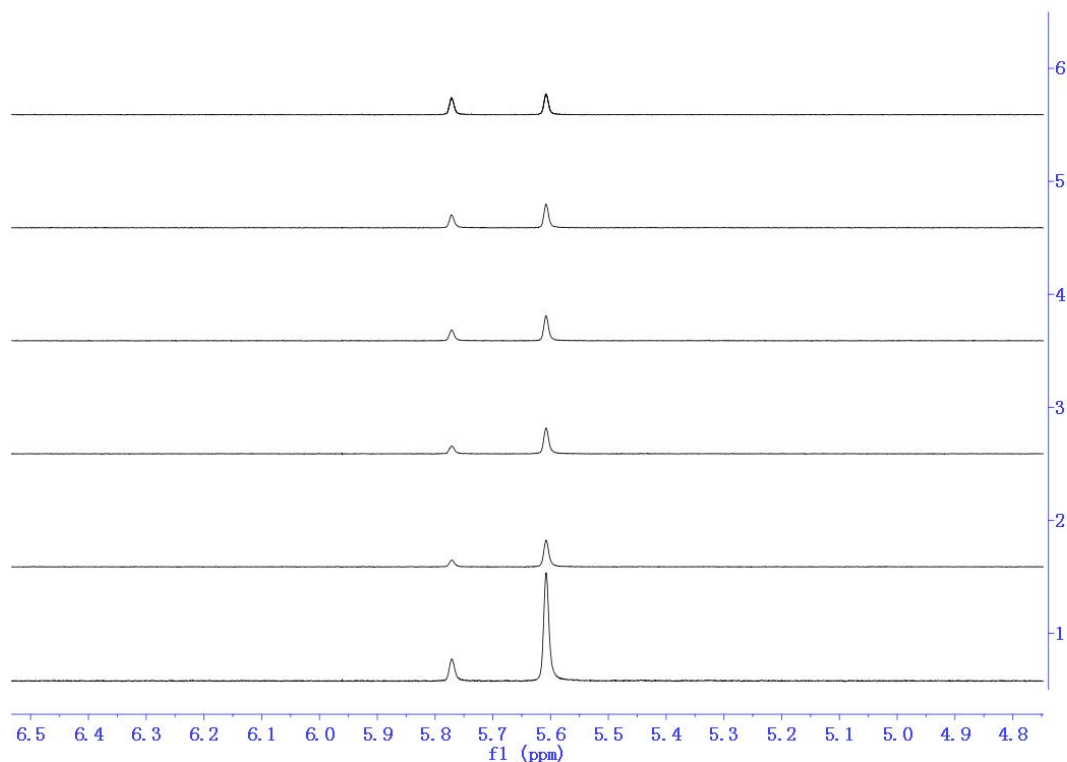

**Figure S21. Rational barrier study overlay of 2 in  $\text{CDCl}_3$  via NMR (293K)**

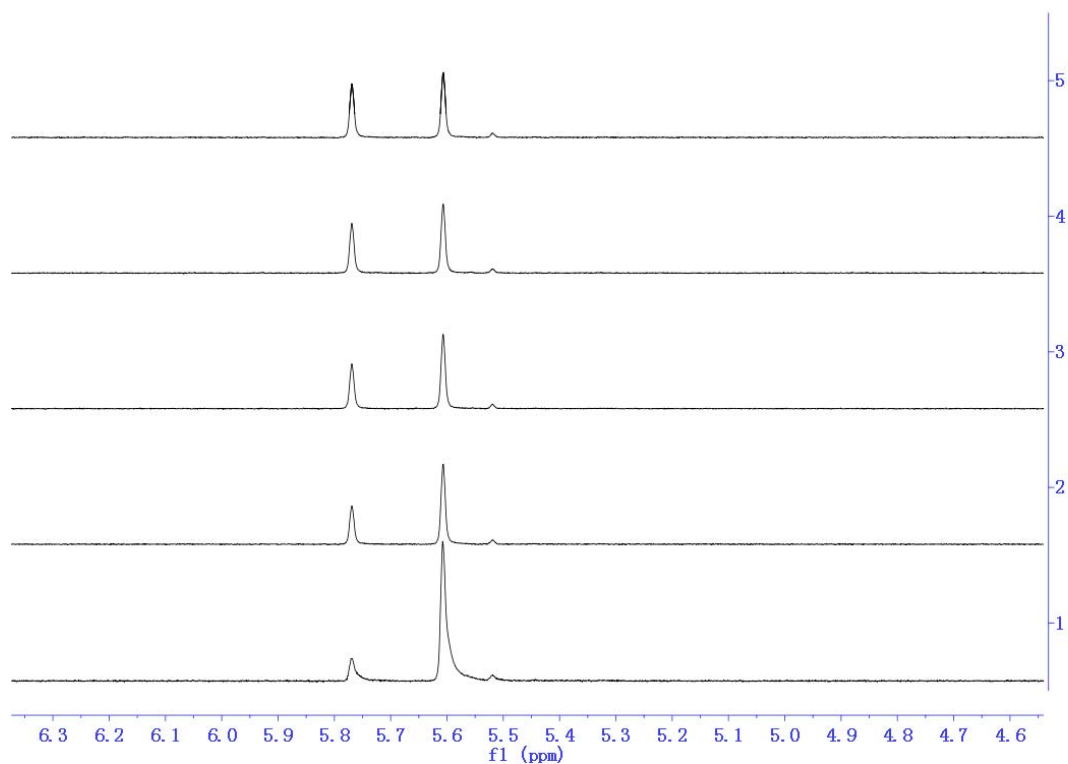

**Figure S22. Rational barrier study overlay of 2 in CDCl<sub>3</sub> via NMR (303K)**

**Protonation-controlled study**

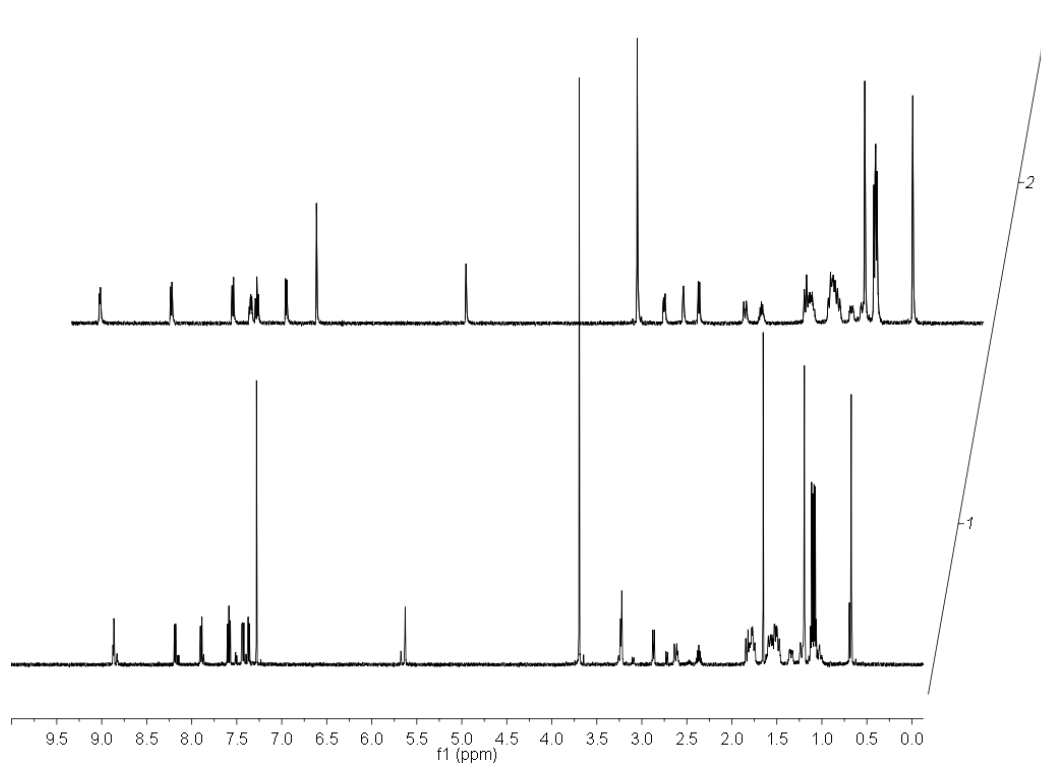

**Figure S23. Full <sup>1</sup>H NMR (500 MHz) spectra of 2 when titrated with various equivalence of TFA in CDCl<sub>3</sub> at rt.**

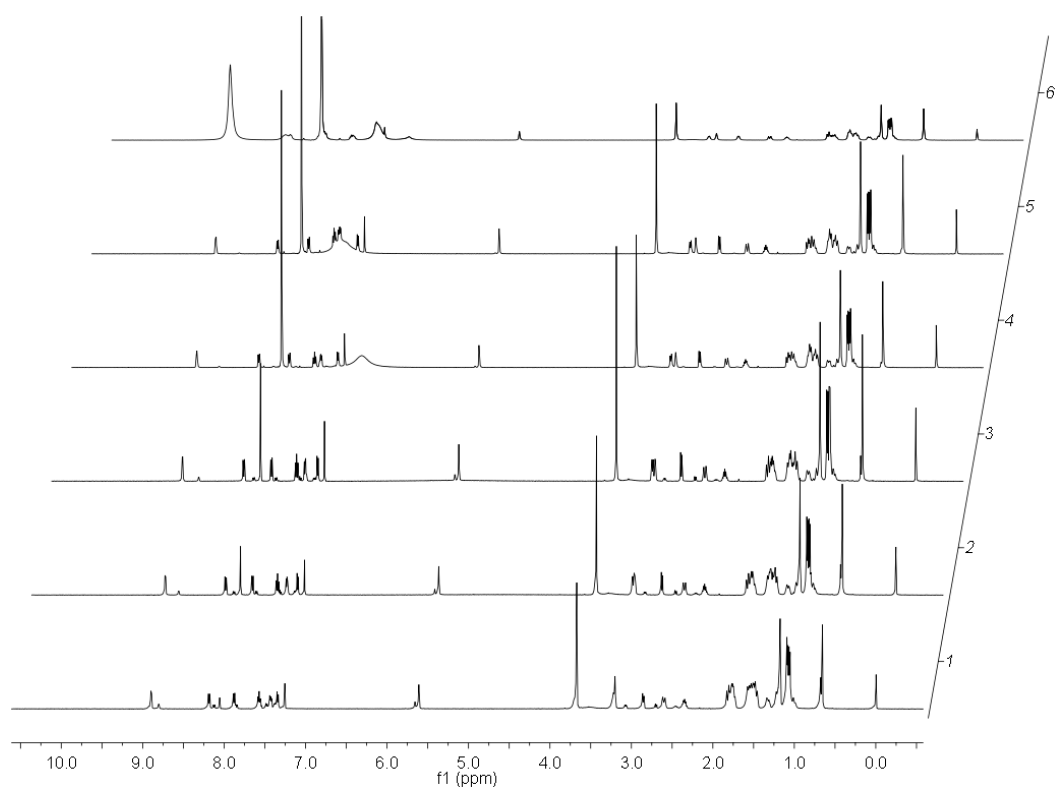

**Figure S24.** Full  $^1\text{H}$  NMR (500 MHz) spectra of **2** when titrated with various equivalence of  $\text{CH}_3\text{COOH}$  in  $\text{CDCl}_3$  at rt.

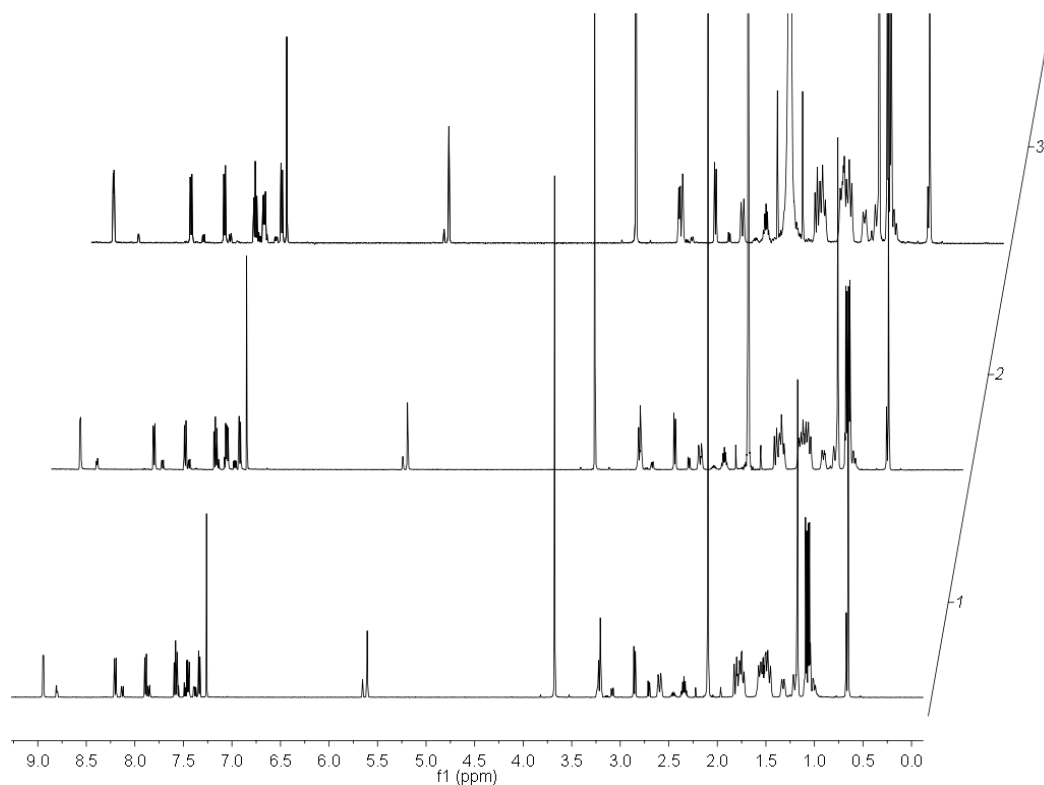

**Figure S25.** Full  $^1\text{H}$  NMR (500 MHz) spectra of **2** when titrated with various equivalence of  $\text{HCOOH}$  in  $\text{CDCl}_3$  at rt.

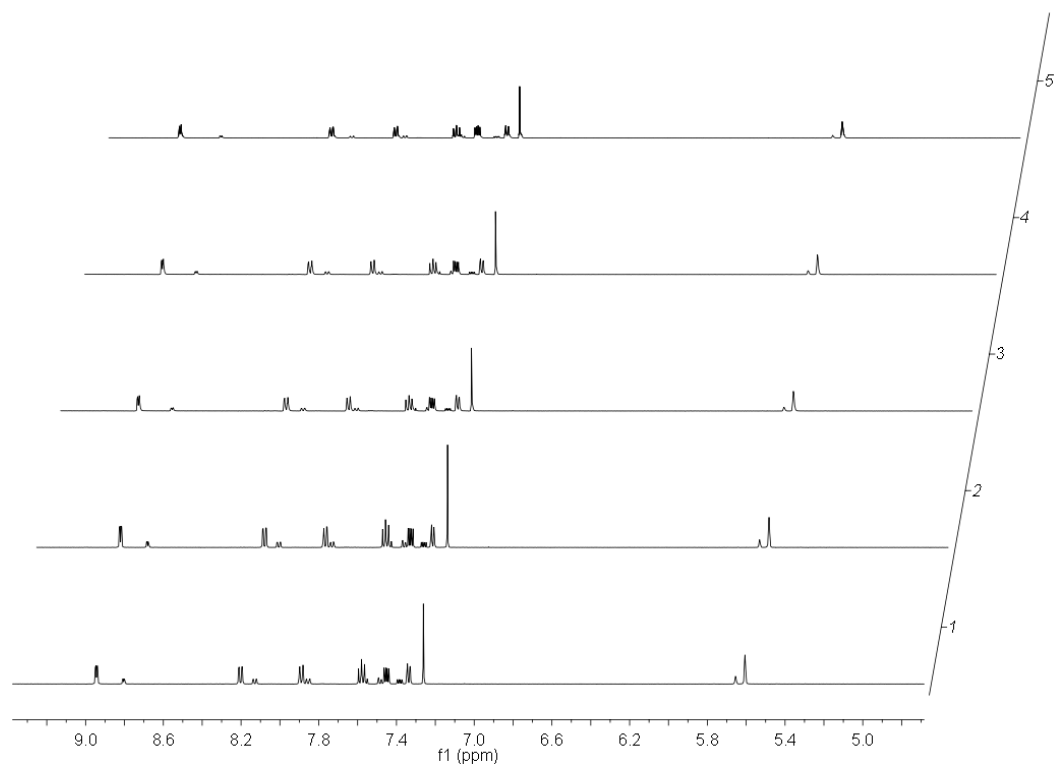

**Figure S26.** Full  $^1\text{H}$  NMR (500 MHz) spectra of **2** when titrated with various equivalence of  $\text{HCOOH}$  in  $\text{CDCl}_3$  at rt.
